# Supplementary material
Source: PubMed Central journal article supplement (PMC3068864)
Supplement: NIHMS279457-supplement-Supplementary_Figures.pdf [file NIHMS279457-supplement-Supplementary_Figures.pdf]

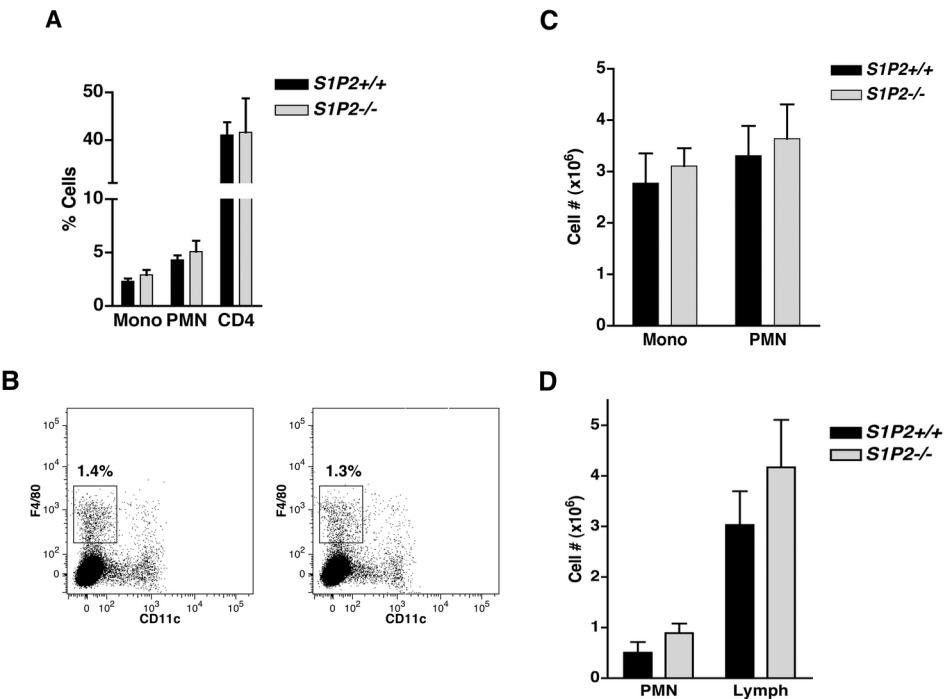

Supplemental Figure 1. A and B, Peripheral blood leukocyte and splenic macrophage content, respectively, in *S1P2*<sup>-/-</sup> and *S1P2*<sup>+/+</sup> mice at day 5 of thioglycollate peritonitis. C and D, Monocyte, neutrophil and lymphocyte numbers in the peritoneum of *S1P2*<sup>-/-</sup> and *S1P2*<sup>+/+</sup> mice at 24 hours (C) and 5 days (D) of thioglycollate peritonitis. No significant differences were found.

**A**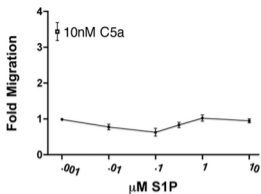**B**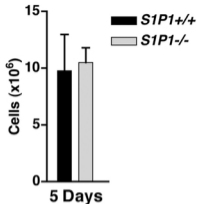

Supplemental Figure 2. A, S1P is not chemotactic for BMM over a wide concentration range. Migration towards C5a is shown for reference. B, Macrophage cell numbers in the peritoneum of *S1P1*<sup>-/-</sup> and *S1P1*<sup>+/+</sup> bone marrow chimeras at day 5 of thioglycollate peritonitis. No significant differences were found.
